# Supplementary material for: Design of “green” plasmonic nanocomposites with multi-band blue emission for ultrafast laser hyperthermia
Source: Royal Society of Chemistry journal article supplement (doi:10.1039/d4nr03120b), 2024-01-01
Supplement: d4nr03120b1.pdf [file d4nr03120b1.pdf]

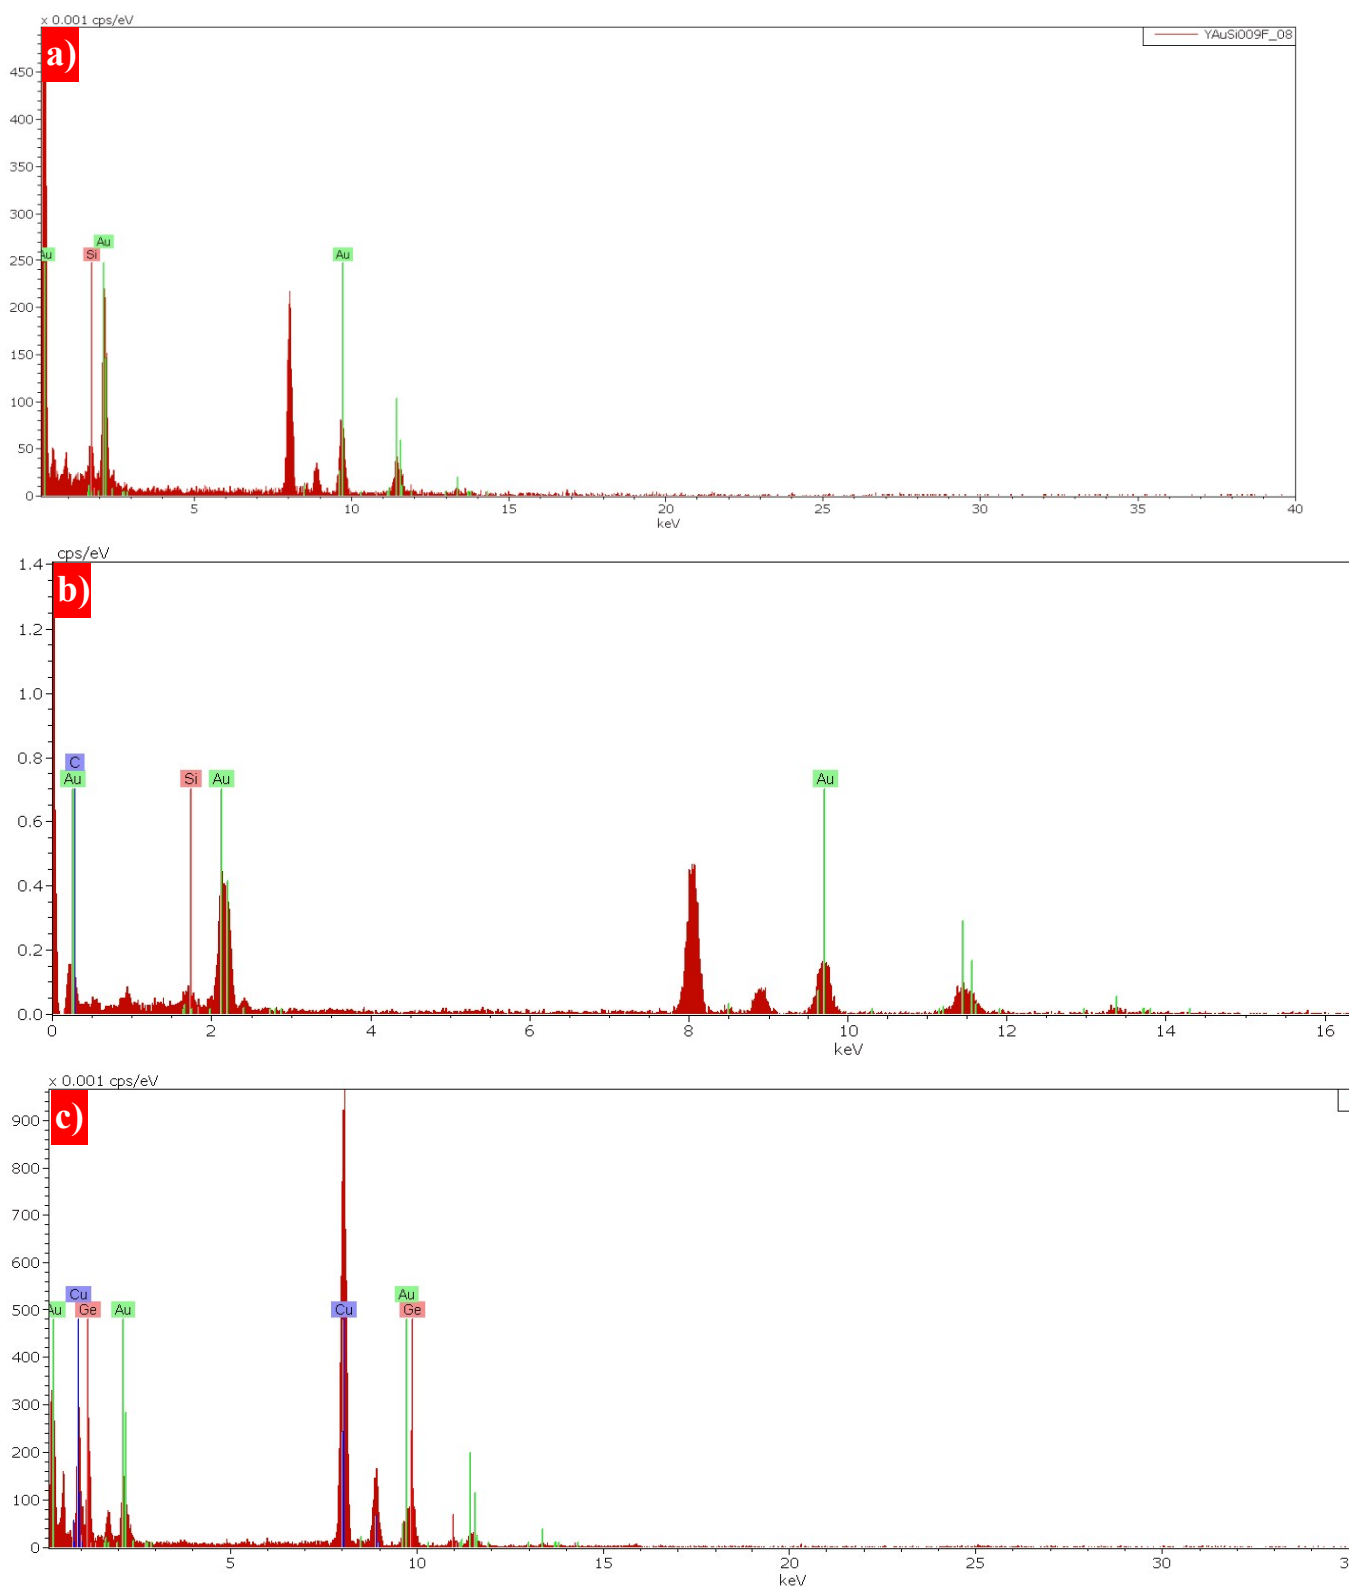

Figure S1. EDX images of: a) Au-Si NCs, b) Au-SiC NCs, c) Au-Ge NCs.

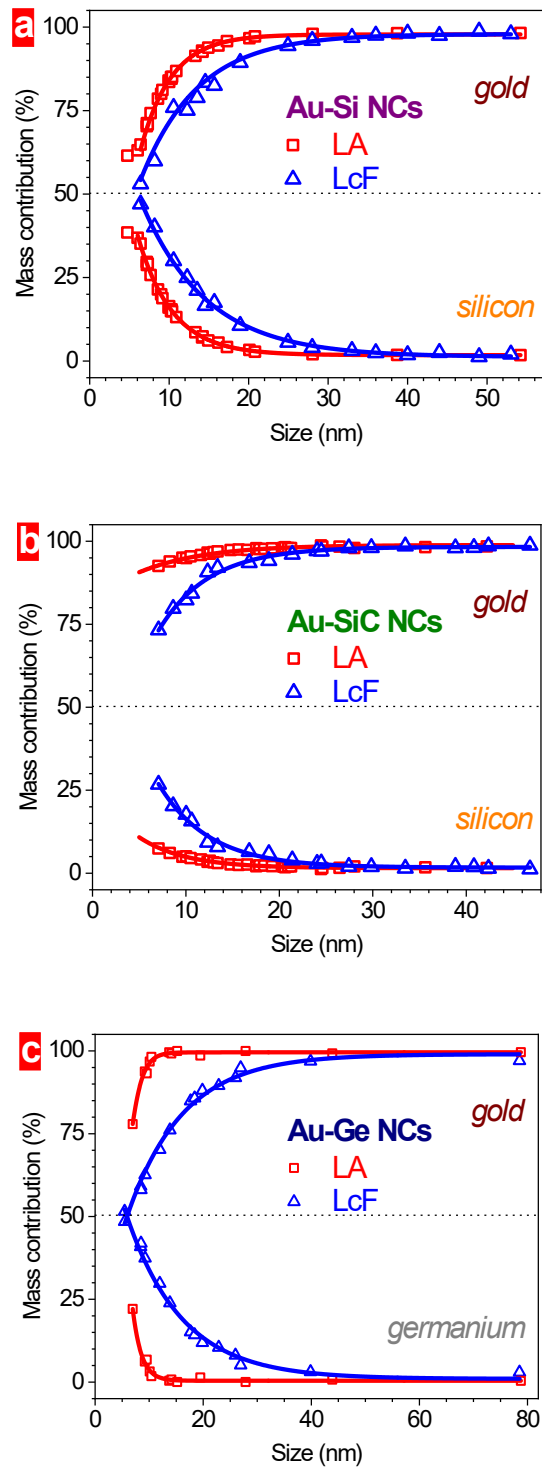

Figure S2. Size-dependent mass contribution of different elements in metallic-semiconductor nanocomposites: a) Au-Si NCs; b) Au-SiC NCs; c) Au-Ge NCs.

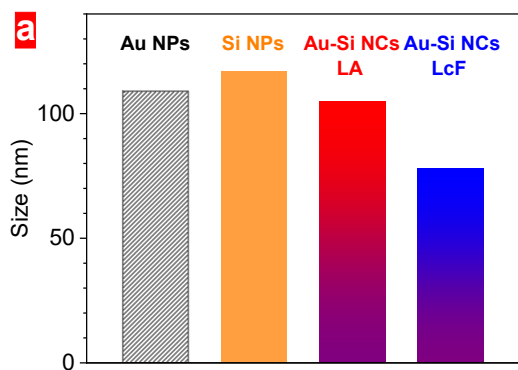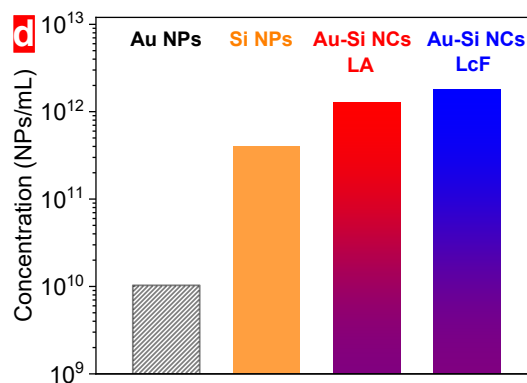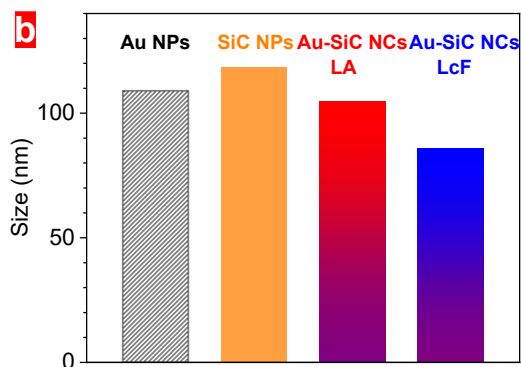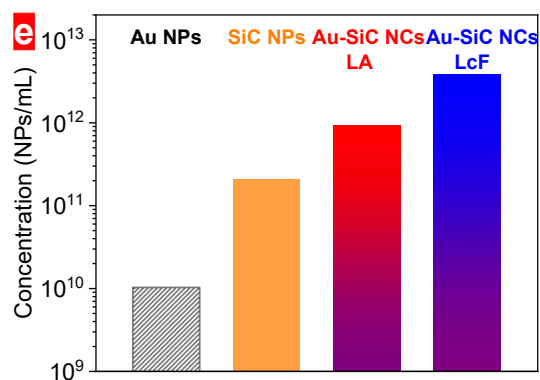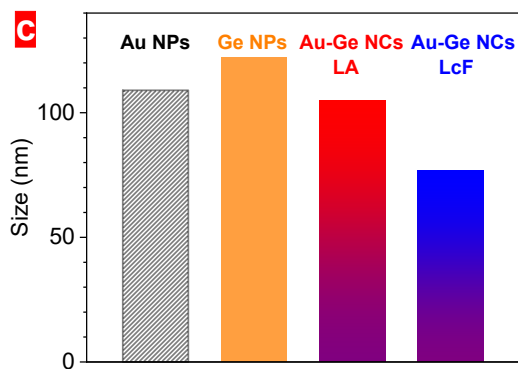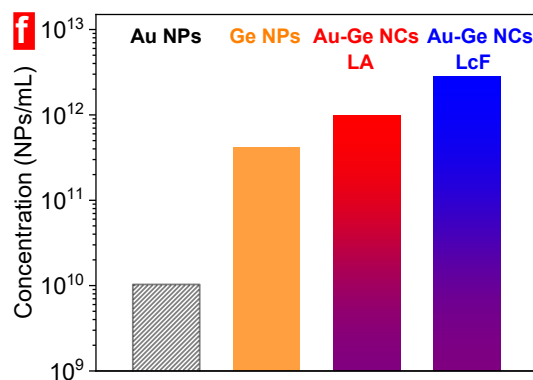

Figure S3. Hydrodynamic size (a-c) and particle concentration (d-f) of metallic-semiconductor NCs as compared to corresponding single-element NPs.

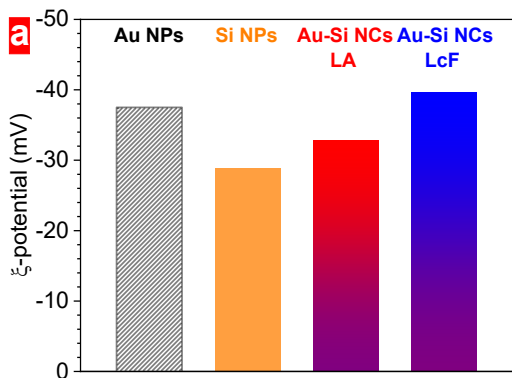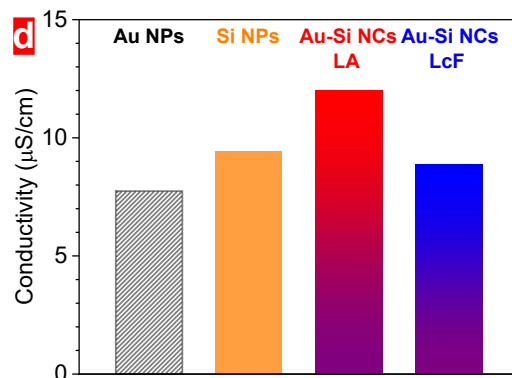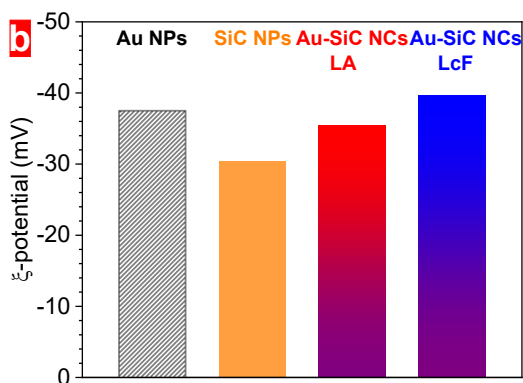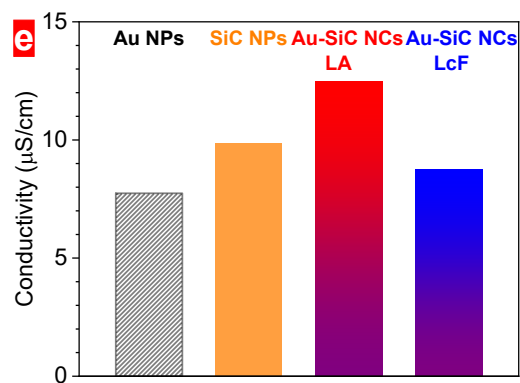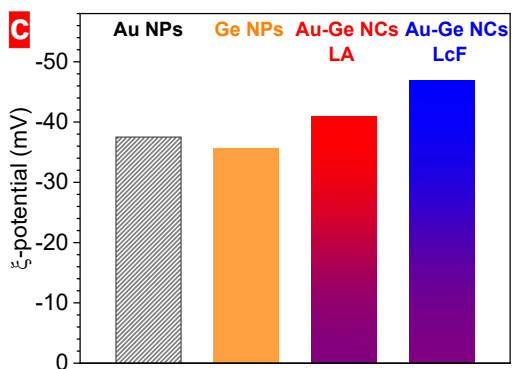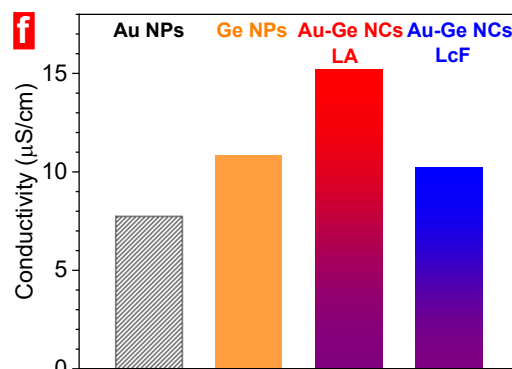

Figure S4.  $\zeta$ -potential (a-c) and electrical conductivity (d-f) of metallic-semiconductor NCs as compared to corresponding single-element NPs.

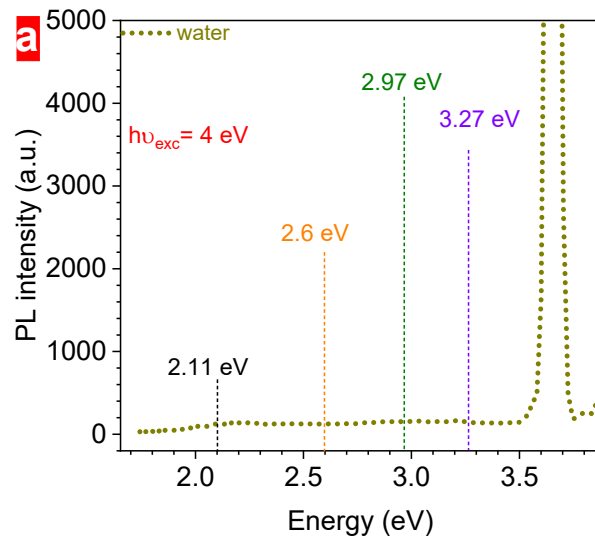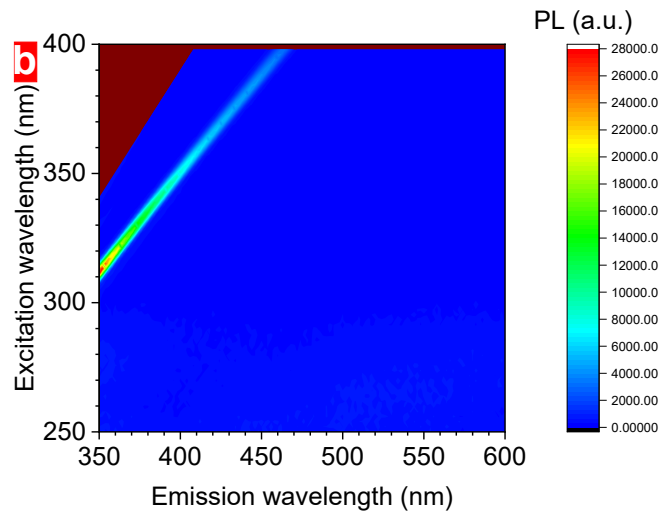

Figure S5. a) PL spectrum and b) mapping of pure deionized water.

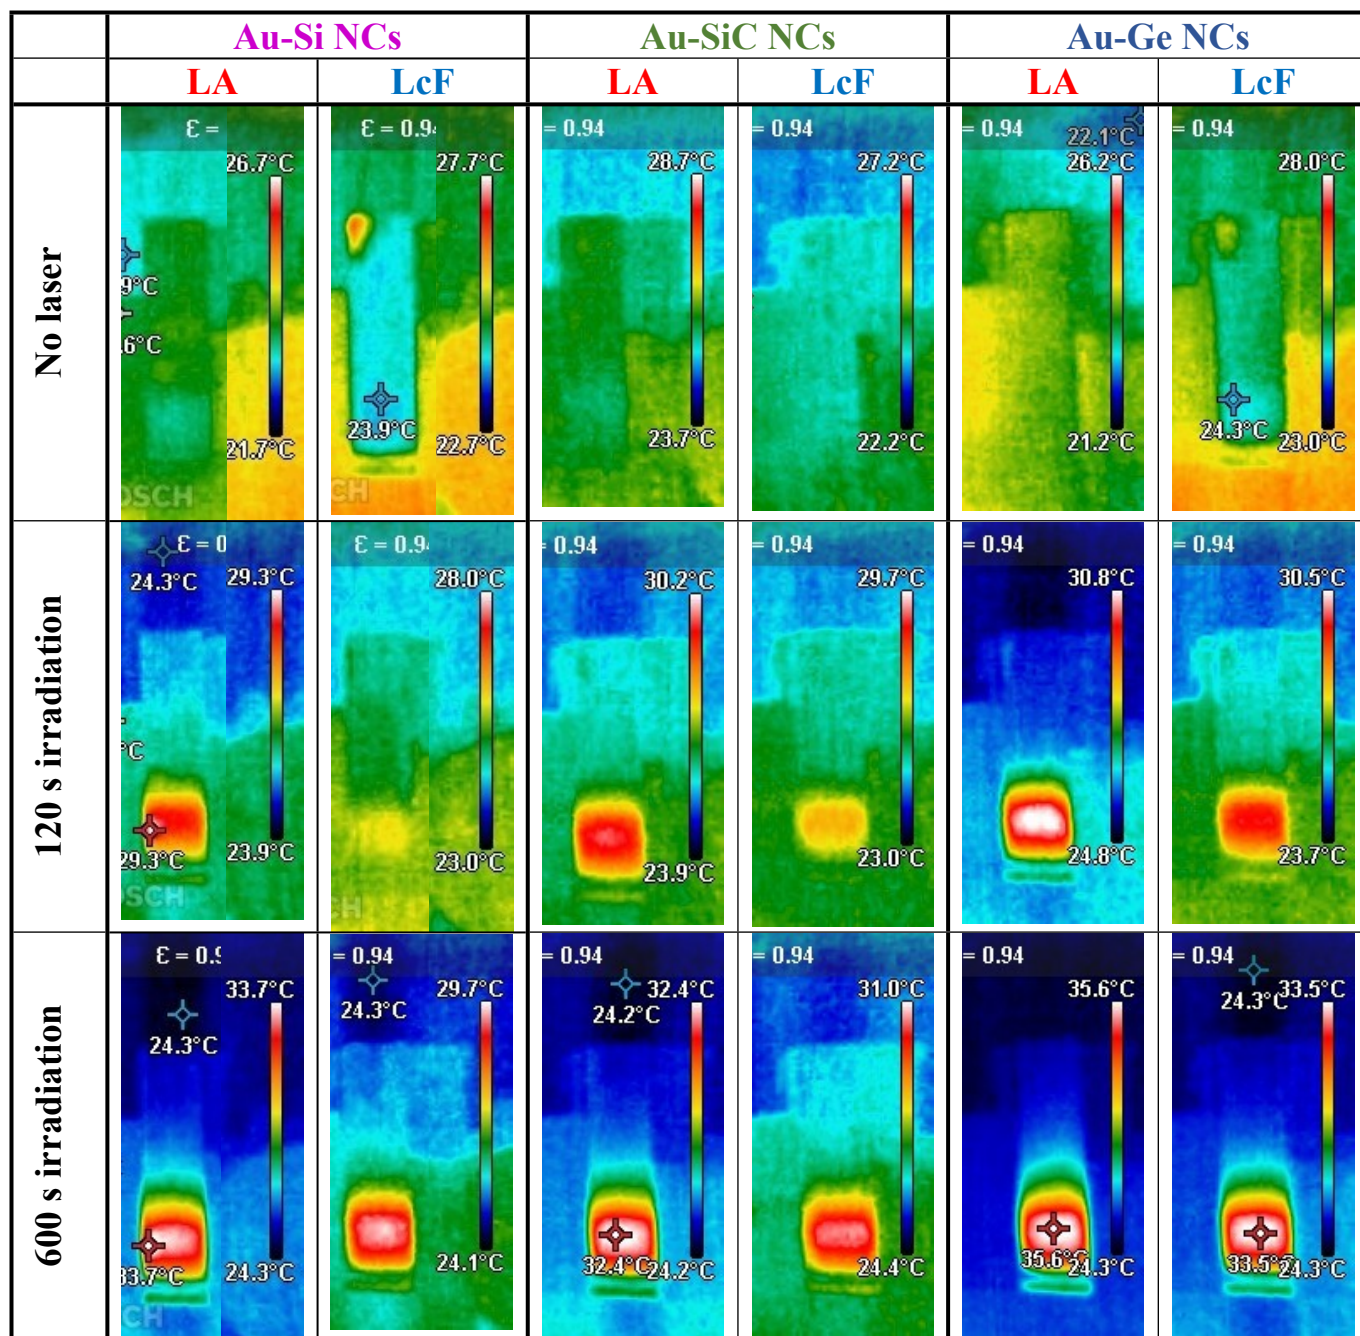

Figure S6. Ultrafast laser-induced heating images of Au-Si NCs, Au-SiC NCs and Au-Ge NCs formed by LA and LcF approaches.
